# Supplementary material for: Venous Thromboembolism Management throughout the COVID-19 Era: Addressing Acute and Long-Term Challenges
Source: MDPI journal article supplement (doi:10.3390/jcm13061825), 2024-03-21
Supplement: s1 [file s1]

## Supplementary Materials

Table S1. Predisposing factors for VTE in the study population.

|                                                                                                                | Whole cohort<br>(n= 157) | VTE associated<br>with COVID-19<br>(n=30) | VTE unrelated<br>to COVID-19<br>(n=127) | p      |
|----------------------------------------------------------------------------------------------------------------|--------------------------|-------------------------------------------|-----------------------------------------|--------|
| <b><u>MAJOR risk factors</u></b>                                                                               |                          |                                           |                                         |        |
| Fracture of the lower limbs or major trauma–<br><i>n (%)</i>                                                   | 3 (1.9%)                 | 0                                         | 3 (2.4%)                                | >0.999 |
| Prior VTE (PE or DVT)–<br><i>n (%)</i>                                                                         | 23 (14.6%)               | 1 (3.3%)                                  | 22 (17.3%)                              | 0.081  |
| Spinal cord injury– <i>n (%)</i>                                                                               | 0                        | 0                                         | 0                                       | >0.999 |
| Hospitalization due to congestive heart failure or atrial fibrillation/flutter (within 3 months)– <i>n (%)</i> | 1 (0.6%)                 | 0                                         | 1 (0.8%)                                | >0.999 |
| Previous hip or knee replacement– <i>n (%)</i>                                                                 | 0                        | 0                                         | 0                                       | >0.999 |
| Myocardial infarction (within 3 months)– <i>n (%)</i>                                                          | 0                        | 0                                         | 0                                       | >0.999 |
| <b><u>MODERATE risk factors</u></b>                                                                            |                          |                                           |                                         |        |
| Arthroscopic surgery of the knee – <i>n (%)</i>                                                                | 0                        | 0                                         | 0                                       | >0.999 |
| Autoimmune disease– <i>n (%)</i>                                                                               | 17 (10.8%)               | 1 (3.3%)                                  | 16 (12.6%)                              | 0.076  |
| Blood transfusions– <i>n (%)</i>                                                                               | 0                        | 0                                         | 0                                       | >0.999 |
| Central venous line– <i>n (%)</i>                                                                              | 2 (1.3%)                 | 0                                         | 2 (1.6%)                                | >0.999 |
| Intravenous catheter and electrocatheter–<br><i>n (%)</i>                                                      | 2 (1.3%)                 | 1 (3.3%)                                  | 1 (0.8%)                                | 0.346  |
| Chemotherapy– <i>n (%)</i>                                                                                     | 11 (7%)                  | 1 (3.3%)                                  | 10 (7.9%)                               | 0.692  |
| Congestive heart failure or respiratory failure – <i>n (%)</i>                                                 | 12 (7.6%)                | 2 (6.7%)                                  | 10 (7.9%)                               | >0.999 |
| Erythropoiesis-stimulating agents – <i>n (%)</i>                                                               | 0                        | 0                                         | 0                                       | >0.999 |
| Hormone replacement therapy– <i>n (%)</i>                                                                      | 1 (0.6%)                 | 0                                         | 1 (0.8%)                                | >0.999 |
| In vitro fertilization–<br><i>n (%)</i>                                                                        | 1 (0.6%)                 | 0                                         | 1 (0.8%)                                | >0.999 |
| Oral contraceptive therapy– <i>n (%)</i>                                                                       | 1 (0.6%)                 | 0                                         | 1 (0.8%)                                | >0.999 |
| Postpartum period– <i>n (%)</i>                                                                                | 0                        | 0                                         | 0                                       | >0.999 |
| Infection (i.e. pneumonia, UTI)– <i>n (%)</i>                                                                  | 54 (34.4%)               | 27 (90%)                                  | 27 (21.3%)                              | <0.001 |
| HIV– <i>n (%)</i>                                                                                              | 3 (1.9%)                 | 0                                         | 3 (2.4%)                                | >0.999 |
| Inflammatory Bowel Disease– <i>n (%)</i>                                                                       | 2 (1.3%)                 | 1 (3.3%)                                  | 1 (0.8%)                                | 0.346  |
| Cancer (highest risk in metastatic disease) –<br><i>n (%)</i>                                                  | 35 (22.3%)               | 3 (10%)                                   | 32 (25.2%)                              | 0.089  |
| Paralytic stroke– <i>n (%)</i>                                                                                 | 0                        | 0                                         | 0                                       | >0.999 |
| Superficial vein thrombosis– <i>n (%)</i>                                                                      | 4 (2.5%)                 | 0                                         | 4 (3.1%)                                | >0.999 |
| Thrombophilia– <i>n (%)</i>                                                                                    | 3 (1.9%)                 | 0                                         | 3 (2.4%)                                | >0.999 |
| <b><u>MINOR risk factors</u></b>                                                                               |                          |                                           |                                         |        |
| Bed rest> 3 days– <i>n (%)</i>                                                                                 | 7 (4.5%)                 | 2 (6.7%)                                  | 5 (3.9%)                                | 0.619  |

|                                                                                             |            |            |            |        |
|---------------------------------------------------------------------------------------------|------------|------------|------------|--------|
| <b>Diabetes – <i>n</i> (%)</b>                                                              | 22 (14%)   | 2 (6.7%)   | 20 (12.7%) | 0.253  |
| <b>Hypertension - <i>n</i> (%)</b>                                                          | 85 (54.1%) | 17 (56%)   | 68 (53.5%) | 0.839  |
| <b>Immobility due to circumstances (i.e prolonged travel by plane or car)– <i>n</i> (%)</b> | 0          | 0          | 0          | >0.999 |
| <b>Age&gt; 65 – <i>n</i> (%)</b>                                                            | 94 (59.9%) | 17 (56.7%) | 77 (60.6%) | 0.685  |
| <b>Laparoscopic surgery (i.e. cholecystectomy)– <i>n</i> (%)</b>                            | 1 (0.6%)   | 0          | 1 (0.8%)   | >0.999 |
| <b>Obesity– <i>n</i> (%)</b>                                                                | 20 (12.7%) | 5 (16.7%)  | 15 (11.8%) | 0.542  |
| <b>Pregnancy– <i>n</i> (%)</b>                                                              | 0          | 0          | 0          | >0.999 |
| <b>Varicose veins– <i>n</i> (%)</b>                                                         | 12 (7.6%)  | 1 (3.3%)   | 11 (8.7%)  | 0.464  |

VTE = venous thromboembolism, PE = pulmonary embolism, DVT = deep vein thrombosis, UTI = urinary tract infection.

**Table S2.** Characteristics of the compression ultrasound examination assessment.

| CUS                     | Whole cohort          | VTE associated with<br>COVID-19 | VTE unrelated to<br>COVID-19 | p            |
|-------------------------|-----------------------|---------------------------------|------------------------------|--------------|
| <b><u>Baseline</u></b>  | <b>n=84 (53.5%)</b>   | <b>n=14 (46.67%)</b>            | <b>n=70 (55.12%)</b>         |              |
| No DVT                  | 41 (48.81%)           | 13 (92.86%)                     | 28 (40%)                     | <b>0.001</b> |
| Partial thrombosis      | 13 (15.47%)           | 0                               | 13 (18.57%)                  |              |
| Occlusive thrombosis    | 30 (35.71%)           | 1 (7.14%)                       | 29 (41.43%)                  |              |
| <b><u>1 month</u></b>   | <b>n= 27 (17.19%)</b> | <b>n=3 (10%)</b>                | <b>n=24 (18.89%)</b>         |              |
| No DVT                  | 18 (66.67%)           | 2 (66.66%)                      | 16 (66.67%)                  | 0.755        |
| Partial thrombosis      | 6 (22.22%)            | 1 (33.33%)                      | 5 (20.83%)                   |              |
| Occlusive thrombosis    | 3 (11.11%)            | 0                               | 3 (12.5%)                    |              |
| <b><u>3 months</u></b>  | <b>n=21 (13.37%)</b>  | <b>n=3 (10%)</b>                | <b>n=18 (14.17%)</b>         |              |
| No DVT                  | 17 (80.95%)           | 3 (100%)                        | 14 (77.78%)                  | 0.662        |
| Partial thrombosis      | 3 (14.28%)            | 0                               | 3 (16.67%)                   |              |
| Occlusive thrombosis    | 1 (4.76%)             | 0                               | 1 (5.56%)                    |              |
| <b><u>6 months</u></b>  | <b>n=12 (7.64%)</b>   | <b>n=0</b>                      | <b>n=12 (10.72%)</b>         |              |
| No DVT                  | 7 (58.33%)            | 0                               | 7 (58.33%)                   | na           |
| Partial thrombosis      | 3 (25%)               | 0                               | 3 (25%)                      |              |
| Occlusive thrombosis    | 2 (16.67%)            | 0                               | 2 (16.67%)                   |              |
| <b><u>12 months</u></b> | <b>n=3 (1.91%)</b>    | <b>n=0</b>                      | <b>n=3 (2.36%)</b>           |              |
| No DVT                  | 1 (33.33%)            | 0                               | 1 (33.33%)                   | na           |
| Partial thrombosis      | 2 (66.66%)            | 0                               | 2 (66.66%)                   |              |
| Occlusive thrombosis    | 0                     | 0                               | 0                            |              |
| <b><u>18 months</u></b> | <b>n=3 (1.91%)</b>    | <b>n=0</b>                      | <b>n=3 (2.36%)</b>           |              |
| No DVT                  | 2 (66.66%)            | 0                               | 2 (66.66%)                   | na           |
| Partial thrombosis      | 0                     | 0                               | 0                            |              |
| Occlusive thrombosis    | 1 (33.33%)            | 0                               | 1 (33.33%)                   |              |
| <b><u>24 months</u></b> | <b>n=2 (11.76%)</b>   | <b>n=0</b>                      | <b>n=2 (1.57%)</b>           |              |
| No DVT                  | 1 (50%)               | 0                               | 1 (50%)                      | na           |
| Partial thrombosis      | 1 (50%)               | 0                               | 1 (50%)                      |              |
| Occlusive thrombosis    | 0                     | 0                               | 0                            |              |

CUS, compression ultrasound; DVT, deep vein thrombosis

Table S3. VTE BLEED score during the study time points.

|                         | Whole cohort          | VTE associated<br>with COVID-19 | VTE unrelated to<br>COVID-19 | p      |
|-------------------------|-----------------------|---------------------------------|------------------------------|--------|
| <b><u>Baseline</u></b>  | <b>n=157</b>          | <b>n=30</b>                     | <b>n=127</b>                 |        |
| Low risk– n (%)         | 82 (52.23%)           | 18 (60%)                        | 64 (50.39%)                  | 0.417  |
| High risk– n (%)        | 75 (47.77%)           | 12 (40%)                        | 63 (49.61%)                  |        |
| <b><u>1 month</u></b>   | <b>n=145 (92.36%)</b> | <b>n=27 (90%)</b>               | <b>n=118 (92.91%)</b>        |        |
| Low risk– n (%)         | 76 (52.41%)           | 14 (51.85%)                     | 62 (52.54%)                  | >0.999 |
| High risk– n (%)        | 69 (47.59%)           | 13 (48.15%)                     | 56 (47.46%)                  |        |
| <b><u>3 months</u></b>  | <b>n=96 (61.15%)</b>  | <b>n=24 (80%)</b>               | <b>n=72 (56.69%)</b>         |        |
| Low risk– n (%)         | 56 (58.33%)           | 16 (66.67%)                     | 40 (55.56%)                  | 0.474  |
| High risk– n (%)        | 40 (41.67%)           | 8 (33.33%)                      | 32 (44.44%)                  |        |
| <b><u>6 months</u></b>  | <b>n=73 (46.5%)</b>   | <b>n=19 (63.33%)</b>            | <b>n=54 (42.52%)</b>         |        |
| Low risk– n (%)         | 46 (63.01%)           | 16 (84.21%)                     | 30 (55.56%)                  | 0.0298 |
| High risk– n (%)        | 27 (23.99%)           | 3 (15.79%)                      | 24 (44.44%)                  |        |
| <b><u>12 months</u></b> | <b>n=36 (22.92%)</b>  | <b>n=7 (23.33%)</b>             | <b>n=29 (22.83%)</b>         |        |
| Low risk– n (%)         | 23 (63.89%)           | 5 (71.43%)                      | 18 (62.07%)                  | >0.999 |
| High risk– n (%)        | 13 (36.11%)           | 2 (28.57%)                      | 11 (37.93%)                  |        |
| <b><u>18 months</u></b> | <b>n=21 (13.38%)</b>  | <b>n=2 (6.67%)</b>              | <b>n=19 (14.96%)</b>         |        |
| Low risk– n (%)         | 13 (61.9%)            | 2 (100%)                        | 11 (57.9%)                   | 0.505  |
| High risk– n (%)        | 8 (38.1%)             | 0                               | 8 (42.1%)                    |        |
| <b><u>24 months</u></b> | <b>n=12 (7.64%)</b>   | <b>n=2 (6.67%)</b>              | <b>n=10 (7.87%)</b>          |        |
| Low risk– n (%)         | 7 (58.33%)            | 2 (100%)                        | 5 (50%)                      | 0.470  |
| High risk– n (%)        | 5 (41.66%)            | 0                               | 5 (50%)                      |        |

Table S4. Signs of pulmonary hypertension at trans-thoracic echocardiography in the first six-months.

|                 | Whole cohort   | VTE associated<br>with COVID-19 | VTE unrelated<br>to COVID-19 | p     |
|-----------------|----------------|---------------------------------|------------------------------|-------|
| <b>Baseline</b> | 17/94 (18.08%) | 1/15 (6.67%)                    | 16/79 (20.25%)               | 0.291 |
| <b>3 months</b> | 6 /45 (13.33%) | 1/15 (6.67%)                    | 5/79 (16.67%)                | 0.647 |
| <b>6 months</b> | 7 /18(38.89%)  | 0/4                             | 7 /14(50%)                   | 0.119 |
